# Supplementary material for: The Association between Environmental Lead Exposure and High School Educational Outcomes in Four Communities in New South Wales, Australia
Source: MDPI journal article supplement (doi:10.3390/ijerph14111395), 2017-11-16
Supplement: s1 [file s1]

| <b>Educational Outcome</b> | <b>Years for which data has been supplied</b> | <b>Number of Years</b> |
|----------------------------|-----------------------------------------------|------------------------|
| HSC English                | 2008 -2014                                    | 7                      |
| Sc English – Literacy      | 2008-2011                                     | 4                      |
| SC Mathematics             | 2008-2011                                     | 4                      |
| Rate of Retention          | 2008-2012                                     | 5                      |
| ATAR Eligibility Rate      | 2008-2012                                     | 5                      |
