# Supplementary material for: The Association between Environmental Lead Exposure and High School Educational Outcomes in Four Communities in New South Wales, Australia
Source: MDPI journal article supplement (doi:10.3390/ijerph14111395), 2017-11-16
Supplement: s1 [file s1]

Number of schools in comparison school groups

| <b>School Name</b>     | <b>2008</b> | <b>2009</b> | <b>2010</b> | <b>2011</b> | <b>2012</b> | <b>2013</b> | <b>2014</b> | <b>AV</b> |
|------------------------|-------------|-------------|-------------|-------------|-------------|-------------|-------------|-----------|
| Broken Hill HS         | 6           | 3           | 18          | 11          | 7           | 6           | 7           | 8.3       |
| Willyama HS            | 5           | 3           | 13          | 4           | 2           | 12          | 11          | 7.1       |
| Lake Macquarie HS      | 9           | 8           | 16          | 14          | 16          | 6           | 10          | 9.88      |
| Glendale Technology HS | 10          | 10          | 19          | 12          | 7           | 9           | 15          | 11.7      |
| Warrawong HS           | 3           | 4           | 8           | 11          | 17          | 6           | 16          | 9.3       |
| Illawarra Sports HS    | 8           | 6           | 9           | 7           | 10          | 10          | 11          | 8.7       |
| Marrickville HS        | 8           | Na #        | 17          | 10          | 5           | 8           | 7           | 9.2       |
