# Supplementary material for: The Association between Environmental Lead Exposure and High School Educational Outcomes in Four Communities in New South Wales, Australia
Source: Int J Environ Res Public Health. 2017 Nov 16;14(11):1395. doi: 10.3390/ijerph14111395 (PMC5708034; doi:10.3390/ijerph14111395)
Supplement: Supplementary file 1 [file ijerph-14-01395-s001.zip]

Archive with 5 entries (5 files):
- Table S3 BOSTES HLRA student numbers.ods
- Table S4 DOE in-area enrolment rates and HLRA student numbers.xls
- Table S5 Number of schools in CSGs.pdf
- Table S1 Summary of data time frames.pdf
- Table S2 ABS HLR SA1s-suburb lists.ods
