# Supplementary material for: The Association between Environmental Lead Exposure and High School Educational Outcomes in Four Communities in New South Wales, Australia
Source: Int J Environ Res Public Health. 2017 Nov 16;14(11):1395. doi: 10.3390/ijerph14111395 (PMC5708034; doi:10.3390/ijerph14111395)
Supplement: Supplementary file 1 [file ijerph-14-01395-s001.zip › Table S2 ABS HLR SA1s-suburb lists.ods]

## Sheet: Sheet1
Broken Hill	3 highest lead risk zones	Boolaroo	3 most contaminated suburbs	Port Kembla	4km radius
Area/Level	Code SA1s	Area/Level	Code	Area/Level	Code
		Suburbs		Suburbs
Highest Risk 1	1109726	Boolaroo – Suburb (all)	10288	Port Kembla – Suburb (all)	11897
	1109744	Argenton – Suburb (all)	10049	Warrawong – Suburb (all)	12424
	1109749	Speers Point – Suburb (all)	12122	Lake Heights – Suburb (all)	11315
				Primbee – Suburb (all)	11911
High Risk 2	1109737	SA1s
	1109739	Boolaroo SA1s	1121415
	1109741		1121418	SA1s
	1109742		1121419	Port Kembla SA1s	1113007
	1109743				1113008
	1109746				1113009
	1109747	Argenton SA1s	1120905		1113010
	1109748		1120906		1113012
	1109751		1120940		1113019
					1113020
					1113021
		Speers Point SA1s	1121401		1113022
		‘	1121402		1113045
			1121403		1113046
			1121407
			1121427	Warrawong SA1s	1113001
			1121428		1113011
			1121430		1113026
					1113027
					1113033
					1113036
					1113037
					1113038
					1113042
					1113043
					1113047
					1113048
					1113052
				Lake Heights SA1s	1113004
					1113005
					1113006
					1113016
					1113017
					1113040
					1113065
				Primbee SA1s	1113023
					1113024
					1113025
					1113034
