# Supplementary material for: The Association between Environmental Lead Exposure and High School Educational Outcomes in Four Communities in New South Wales, Australia
Source: Int J Environ Res Public Health. 2017 Nov 16;14(11):1395. doi: 10.3390/ijerph14111395 (PMC5708034; doi:10.3390/ijerph14111395)
Supplement: Supplementary file 1 [file ijerph-14-01395-s001.zip › Table S3 BOSTES HLRA student numbers.ods]

## Sheet: Sheet1
	Broken Hill				Illawarra				North Lake Mac
	HSC				HSC				HSC
	sts	sts in HLR	%in HLR		sts	sts in HLR	%in HLR		sts	sts in HLR	%in HLR
2008	140	33			167	81			109	30
2009	122	32			153	97			101	17
2010	142	24			141	96			115	26
2011	125	26			156	102			128	33
2012	54	23			108	94			85	32
2013	72	17			84	63			83	34
2014	85	20			93	70			70	36
	SC Maths				SC Maths				SC Maths
	sts in hLr	sts	%in HLR		sts in hLr	sts	%in HLR		sts in hLr	sts	%in HLR
2008	46	231			65	239			29	219
2009	45	207			81	236			31	238
2010	52	190			69	214			37	223
2011	54	206			42	195			41	239
	SC English				SC English				SC English
	sts in HLR	sts	%in HLR		sts in HLR	sts	%in HLR		sts in HLR	sts	%in HLR
2008	46	232			29	238			65	219
2009	45	193			31	236			81	238
2010	52	190			36	215			69	222
2011	55	207			41	197			52	239
	ATAR				ATAR				ATAR
	sts	sts in HLR	% sts in HLR		sts	sts in HLR	% sts in HLR		sts	sts in HLR	% sts in HLR
2008	241	31			242	95			223	24
2009	215	24			244	106			247	34
2010	207	28			235	108			243	42
2011	222	28			215	85			263	42
2012	216	31			205	94			222	48
AVERAGE % of HLR STS
