# Supplementary material for: The Association between Environmental Lead Exposure and High School Educational Outcomes in Four Communities in New South Wales, Australia
Source: Int J Environ Res Public Health. 2017 Nov 16;14(11):1395. doi: 10.3390/ijerph14111395 (PMC5708034; doi:10.3390/ijerph14111395)
Supplement: Supplementary file 1 [file ijerph-14-01395-s001.zip › Table S4 DOE in-area enrolment rates and HLRA student numbers.xls]

## Sheet: DET Suburbs
Enrolments for yr 12	2008	Proportion of sts from highest lead risk suburbs	2009	Proportion of sts from highest lead risk suburbs	2010	Proportion of sts from highest lead risk suburbs	2011	Proportion of sts from highest lead risk suburbs	2012	Proportion of sts from highest lead risk suburbs	2013	Proportion of sts from highest lead risk suburbs	2014	Proportion of sts from highest lead risk suburbs
Figtree High School	(ELIMATED From our study as AVG LEAD <5%)
BERKELEY	1	0.854701			2						3		4
CONISTON	3	2.5641	2	1.88679			2				4		2
FIGTREE	45	38.4615	40	37.7358	35		48		55		39		36
MANGERTON	3	2.5641	4	3.77358	7		3		4		3		4
PORT KEMBLA	1	0.854701													Non leaded
WARRAWONG							1	0.75188	2	1.42857			1	0.775194
PRIMBEE
LAKE HEIGHTS
TOTAL	117	0.854701	106	0	135	0	133	0.75188	140	1.42857	128	0	129	0.775194
Av % HLRA	0.544335
Illawarra Sports High School
BERKELEY	44		47		40		37		49		35		38
CONISTON					1		1
FIGTREE	3										1		2
MANGERTON							1
PORT KEMBLA	9	6.61765	11	9.01639	4	2.98507	12	9.6	5	4.16667	3	3.37079	3	3.06122
WARRAWONG			2	1.63934	3	2.23881	4	3.2	4	3.33333	1	1.1236	2	2.04082
PRIMBEE
LAKE HEIGHTS
TOTAL	136	6.61765	122	10.6557	134	5.22388	125	12.8	120	7.5	89	4.49438	98	5.10204
Av % HLRA	5.47386
Keira High School	(ELIMATED From our study as AVG LEAD <5%)
BERKELEY	1		1						1		2
CONISTON	5		2		3		4		4		5		5
FIGTREE	1		5		2		1		3		3		2
MANGERTON			1		2						3		1
PORT KEMBLA		0	2	2	6	6.97674	2	3.07692	4	3.27869	4	3.53982	1	0.909091
WARRAWONG	1	1.21951	1	1	1	1.16279	2	3.07692	4	3.27869	1	0.884956	1	0.909091
PRIMBEE		0		0		0		0		0		0		0
LAKE HEIGHTS		0		0		0		0		0		0		0
TOTAL	82	1.21951	100	3	86	8.13953	65	6.15385	122	6.55738	113	4.42478	110	1.81818
Av % HLRA	4.47332
Warrawong High School
BERKELEY			4		3		2		4		3		5
FIGTREE	2
MANGERTON	2		1						1		1
PORT KEMBLA	4	9.09091	7	15.5556	4	12.5	6	13.9535	5	10.4167	4	8.51064	6	12.766
WARRAWONG	11	25	10	22.2222	10	31.25	8	18.6047	8	16.6667	11	23.4043	15	31.9149
PRIMBEE		0		0		0		0		0		0		0
LAKE HEIGHTS		0		0		0		0		0		0		0
TOTAL	44	34.0909	45	37.7778	32	43.75	43	32.5581	48	27.0833	47	31.9149	47	44.6809
Av % HLRA	35.9794
Glendale High School
ARGENTON			1	1.17647	1	1.21951	7	8.23529	5	5.81395	4	4.25532	5	5.88235
BOOLAROO	3	3.94737			1	1.21951	2	2.35294	1	1.16279	2	2.12766
SPEERS POINT					1		1	1.17647					1	1.17647
EDGEWORTH	16		17		15		20		17		22		16
GLENDALE	8		8		13		9		7		11		6
TERALBA			4				1				1		1
TOTAL	76	3.94737	85	1.17647	82	2.43902	85	11.7647	86	6.97674	94	6.38298	85	7.05882
Av % HLRA	5.67802
Warners Bay High School	(ELIMATED From our study as AVG LEAD <5%)
ARGENTON					1	0.571429							1	0.613497
BOOLAROO	1	0.636943	1	0.632911							1	0.564972	2	1.22699
SPEERS POINT	4	2.54777	3	1.89873	6	3.42857	4	2.72109	4	2.5	4	2.25989	6	3.68098
EDGEWORTH			1				1		1				1
GLENDALE
TOTAL	157	3.18471	158	2.53165	175	4	147	2.72109	160	2.5	177	2.82486	163	5.52147
Av % HLRA	3.32625
Lake Macquarie High School
BOOLAROO	2	4.87805			3	5.08475	2	4.16667	6	11.1111	1	1.72414	2	3.77358
SPEERS POINT	1	2.43902	6	16.6667	8	13.5593	3	6.25	6	11.1111	10	17.2414	2	3.77358
EDGEWORTH							3
GLENDALE					1				1		1
TERALBA	2		4		9		7		3		9		2
TOTAL	41	7.31707	36	16.6667	59	18.6441	48	10.4167	54	22.2222	58	18.9655	53	7.54717
Av % HLRA	14.5399
Number of HLRA sts attending “non-leaded” schools which were eliminated from our study (data copied from DOE data as provided above)	2008	N sts in leaded schools	2009	N sts in leaded schools	2010	N sts in leaded schools	2011	N sts in leaded schools	2012	N sts in leaded schools	2013	N sts in leaded schools	2014	N sts in leaded schools
Illawarra Region
Figtree High School	1		0		0		1		2		0		1
Keira High School	1		3		7		4		8		5		2
Total Illawarra Region	2	24	3	29	7	21	5	30	10	22	5	19	3	26
% HLR sts in DOE data that are not from leaded schools	8.33333		10.3448		33.3333		16.6667		45.4545		26.3158		11.5385		21.7124
North Lake Macquarie Region
Warners Bay High School	5		4		7		4		4		5		9
Total Illawarra Region	5	6	4	7	7	14	4	15	4	18	5	17	9	10
% HLR sts in DOE data that are not from leaded schools	83.3333		57.1429		50		26.6667		22.2222		29.4118		90		51.2538
BOSTES data on% sts in HLRAs (S3)		Bostes % HLR sts	-% of non leaded HLR sts (from table above)	% non leaded (HLR sts - %non lead HLR sts)	% HLRA sts in leaded schools only
(HSC English)	Broken Hill	25.3	.	.	25.3
	Illawarra	70	0.2171	14.7	55.3
	North Lake Macquarie	31	0.5125	15.81	15.19
BOSTES data on% sts in HLRAs
(avg of 5 ed outcomes)	Broken Hill	21.58	.	.	21.58
	Illawarra	31.26	0.2171	6.78655	24.4735
	North Lake Macquarie	22.96	0.5125	11.767	11.193
BOSTES data on% sts in HLRAs	Broken Hill	27.9467			27.95
(SC Maths)	Illawarra	27.11	0.2171	5.88558	21.2244
	North Lake Macquarie	25.4533	0.5125	13.0448	12.4085

## Sheet: DE Local Vs Out
	In Area Enrolments			Proportion in area enrolments by school	Proportion in area enrolments by region	range	mean
Schools	N	Y	Grand Total
Broken Hill High School		603	603	100		100	100
2008		73	73	100
2009		81	81	100
2010		89	89	100
2011		72	72	100
2012		66	66	100
2013		73	73	100
2014		73	73	100
Glendale High School	263	432	695	62.1583		58-74	61.6956
2008	32	44	76	57.8947
2009	36	49	85	57.6471
2010	33	49	82	59.7561
2011	32	53	85	62.3529
2012	22	64	86	74.4186
2013	40	54	94	57.4468
2014	32	53	85	62.3529
Illawarra Sports High School	355	557	912	61.0746		55-68	60.5191
2008	48	88	136	64.7059
2009	39	83	122	68.0328
2010	54	80	134	59.7015
2011	53	72	125	57.6
2012	50	70	120	58.3333
2013	40	49	89	55.0562
2014	39	59	98	60.2041
Lake Macquarie High School	83	308	391	78.7724		66-89	78.2658
2008	8	33	41	80.4878
2009	4	32	36	88.8889
2010	14	45	59	76.2712
2011	12	36	48	75
2012	7	47	54	87.037
2013	15	43	58	74.1379
2014	18	35	53	66.0377
Marrickville High School	215	114	329	34.6505		26-40	34.3326
2008	20	13	33	39.3939
2009	26	17	43	39.5349
2010	30	15	45	33.3333
2011	29	10	39	25.641
2012	32	15	47	31.9149
2013	27	14	41	34.1463
2014	28	16	44	36.3636
Warrawong High School	88	280	368	76.087		67-87	75.4195
2008	12	32	44	72.7273
2009	6	39	45	86.6667
2010	7	25	32	78.125
2011	9	34	43	79.0698
2012	16	32	48	66.6667
2013	12	35	47	74.4681
2014	14	33	47	70.2128
REGIONAL
			Inarea		%	range	mean
SEA name	Year	N	Y	Grand Total
Broken Hill	2008		194	194	100	100
	2009		185	185	100
	2010		200	200	100
	2011		173	173	100
	2012		161	161	100
	2013		178	178	100
	2014		178	178	100
	2015		210	210	100
Lake Macquarie	2008	217	517	734	70.436	70-78
(North Lake Macquarie)	2009	214	559	773	72.3157
	2010	229	572	801	71.4107
	2011	220	511	731	69.9042		73.2096
	2012	170	592	762	77.6903
	2013	210	611	821	74.4214
	2014	229	609	838	72.673
	2015	219	625	844	74.0521
Port Jackson	2008	587	442	1029	42.9543	15-48
(Marrickville schools)	2009	572	526	1098	47.9053
	2010	637	531	1168	45.4623
	2011	988	178	1166	15.2659
	2012	802	394	1196	32.9431		35.43
	2013	857	385	1242	30.9984
	2014	845	422	1267	33.307
	2015	841	445	1286	34.6034
Wollongong	2008	358	733	1091	67.1861	46-70
(Illawarra) Schools	2009	344	798	1142	69.8774
	2010	373	831	1204	69.0199		57.7833
	2011	597	518	1115	46.4574
	2012	580	618	1198	51.586
	2013	582	584	1166	50.0858
	2014	552	558	1110	50.2703
State	In area
	N	Y	Grand Total
2008	12672	25047	37719	66.4042
2009	12606	26474	39080	67.7431
2010	13340	28181	41521	67.8717
2011	20080	20251	40331	50.212
2012	17032	24167	41199	58.6592
2013	17176	24226	41402	58.5141
2014	17658	24036	41694	57.6486
2015	17493	24344	41837	58.1877
Grand Total	128057	196726	324783	60.5715
